# Supplementary material for: Tetrodotoxin and the Geographic Distribution of the Blue-Lined Octopus Hapalochlaena fasciata on the Korean Coast
Source: MDPI journal article supplement (doi:10.3390/toxins15040279), 2023-04-11
Supplement: s1 [file s1]

(A) Standard

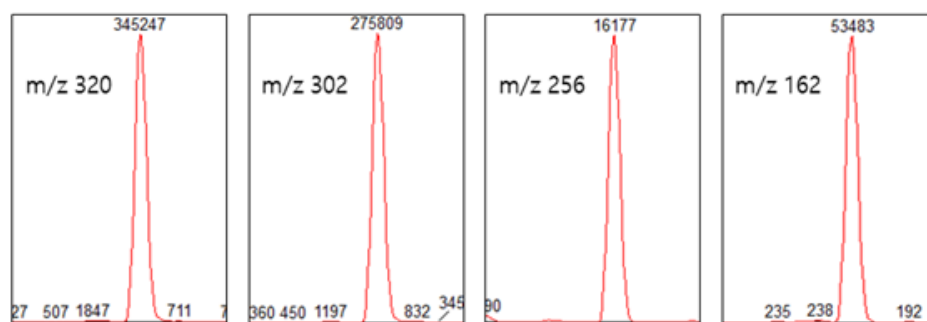

(B) Sample

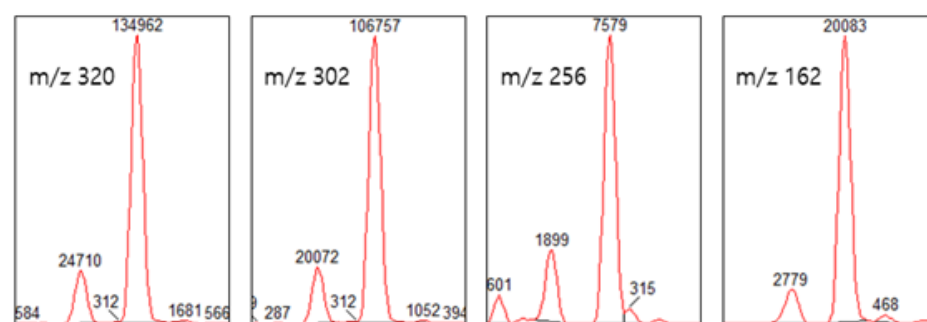

| <i>m/z</i> | Peak ratio (%) |            |
|------------|----------------|------------|
|            | Standard (A)   | Sample (B) |
| 320        | 100            | 100        |
| 302        | 79.9           | 82.8       |
| 256        | 4.7            | 4.4        |
| 162        | 15.5           | 12.6       |

Figure S1. The ratio of the peaks in the TTX standard (A) and tissue sample (B). The table represents the ratio of each peak at 320, 302, 256, and 162 *m/z* in the TTX standard (A) and tissue sample (B).
